# Supplementary material for: Radiographic assessment of endodontic mishaps in an undergraduate student clinic: a 2-year retrospective study
Source: PeerJ. 2022 Aug 4;10:e13858. doi: 10.7717/peerj.13858 (PMC9357366; doi:10.7717/peerj.13858)
Supplement: Data S1 [file peerj-10-13858-s003.xlsx]

## Sheet: Data_PeerJ
No	file	Mishabes	Ledge	Zipping	Apical_perforation	Strip_perforation	furcation_perforation	Root_perforation	Perforations	Instrumentseperation	Ins_sep	Obturationrelatederrors	obt_length	Obt_density	Obt_density2	Presense_of_mishaps	tooth_no	Patientage	Pt_gender	Number_of_canals	Number_of_visits	root_curvature	Instrumetation_technique	Operators	tooth_Anterior_post	Number_of_canals3	Number_of_visits4	root_curvature5
126		1	No	No	Yes	No	No	No	Yes		No		Correct	No Voids	No	Yes	45	49	0	1	4	<5°	Manual	4th	Post	Single	Multiple	straight
539		0	No	No	No	No	No	No	No		No		Correct	Both	Yes	No	11	20	0	1	2	<5°	Manual	4th	Ant	Single	Multiple	straight
211		0	No	No	No	No	No	No	No		No		Correct	Coronal	Yes	No	44	67	0	1	2	<5°	Manual	4th	Post	Single	Multiple	straight
741		1	No	No	Yes	No	No	No	Yes		No		over extended	Both	Yes	Yes	43	31	0	1	3	<5°	Manual	4th	Ant	Single	Multiple	straight
19		1	No	No	Yes	No	No	No	Yes		No		over extended	No Voids	No	Yes	44	38	0	1	3	<5°	Manual	4th	Post	Single	Multiple	straight
351		1	Yes	No	No	No	No	No	No		No		Short	Apical	Yes	Yes	45	38	0	1	4	<5°	Manual	4th	Post	Single	Multiple	straight
219		1	No	No	Yes	No	No	No	Yes		No		over extended	No Voids	No	Yes	46	34	0	3	4	≥25°	Manual	4th	Post	Multiple	Multiple	Curved
645		0	No	No	No	No	No	No	No		No		Correct	Both	Yes	No	22	40	0	1	3	<5°	Manual	4th	Ant	Single	Multiple	straight
302		0	No	No	No	No	No	No	No		No		Correct	No Voids	No	No	16	24	0	4	4	≥25°	Rotary	4th	Post	Multiple	Multiple	Curved
762		0	No	No	No	No	No	No	No		No		Correct	No Voids	No	No	11	28	0	1	3	<5°	Manual	4th	Ant	Single	Multiple	straight
349		0	No	No	No	No	No	No	No		No		Correct	No Voids	No	No	11	77	1	1	4	<5°	Manual	4th	Ant	Single	Multiple	straight
128		0	No	No	No	No	No	No	No		No		Correct	Coronal	Yes	No	11	54	1	1	3	<5°	Manual	4th	Ant	Single	Multiple	straight
580		1	No	No	Yes	No	No	No	Yes		No		Correct	No Voids	No	Yes	46	36	0	3	4	<20°	Manual	4th	Post	Multiple	Multiple	Curved
29		0	No	No	No	No	No	No	No		No		Correct	Coronal	Yes	No	46	24	0	3	3	<20°	Manual	4th	Post	Multiple	Multiple	Curved
238		1	No	No	Yes	No	No	No	Yes		No		Correct	No Voids	No	Yes	37	36	0	1	4	<5°	Manual	4th	Post	Single	Multiple	straight
650		1	No	No	Yes	No	No	No	Yes		No		Correct	Coronal	Yes	Yes	15	46	0	1	4	<5°	Manual	4th	Post	Single	Multiple	straight
606		1	No	No	Yes	No	No	No	Yes		No		over extended	No Voids	No	Yes	21	55	0	1	2	<5°	Manual	4th	Ant	Single	Multiple	straight
755		1	No	No	Yes	No	No	No	Yes		No		over extended	Both	Yes	Yes	36	23	0	3	4	<5°	Rotary	4th	Post	Multiple	Multiple	straight
454		0	No	No	No	No	No	No	No		No		over extended	No Voids	No	No	23	32	0	1	2	<5°	Manual	4th	Ant	Single	Multiple	straight
490		1	No	No	No	Yes	No	No	Yes		No		over extended	Apical	Yes	Yes	33	44	0	2	4	<5°	Manual	4th	Ant	Multiple	Multiple	straight
501		0	No	No	No	No	No	No	No		No		Correct	No Voids	No	No	34	37	0	1	2	<20°	Rotary	4th	Post	Single	Multiple	Curved
44		1	No	No	No	No	No	Yes	Yes		No		Correct	No Voids	No	Yes	12	47	0	1	3	<20°	Manual	4th	Ant	Single	Multiple	Curved
681		0	No	No	No	No	No	No	No		No		Correct	No Voids	No	No	44	33	0	1	2	<20°	Rotary	4th	Post	Single	Multiple	Curved
530		0	No	No	No	No	No	No	No		No		Correct	Apical	Yes	No	11	50	0	1	3	<5°	Manual	4th	Ant	Single	Multiple	straight
212		0	No	No	No	No	No	No	No		No		Correct	Coronal	Yes	No	13	50	1	1	3	<5°	Manual	4th	Ant	Single	Multiple	straight
691		0	No	No	No	No	No	No	No		No		Correct	Apical	Yes	No	33	48	0	1	4	<20°	Manual	4th	Ant	Single	Multiple	Curved
760		0	No	No	No	No	No	No	No		No		Correct	No Voids	No	No	22	25	0	1	3	≥25°	Manual	4th	Ant	Single	Multiple	Curved
348		0	No	No	No	No	No	No	No		No		Correct	No Voids	No	No	22	25	0	1	2	<5°	Manual	4th	Ant	Single	Multiple	straight
594		0	No	No	No	No	No	No	No		No		Correct	Coronal	Yes	No	14	21	0	2	3	<20°	Manual	4th	Post	Multiple	Multiple	Curved
470		0	No	No	No	No	No	No	No		No		Correct	Coronal	Yes	No	25	26	0	1	2	<5°	Manual	4th	Post	Single	Multiple	straight
646		0	No	No	No	No	No	No	No		No		Correct	No Voids	No	No	46	27	0	3	4	<5°	Manual	4th	Post	Multiple	Multiple	straight
364		0	No	No	No	No	No	No	No		No		Correct	No Voids	No	No	36	27	0	3	3	<20°	Rotary	4th	Post	Multiple	Multiple	Curved
692		0	No	No	No	No	No	No	No		No		Correct	No Voids	No	No	46	23	0	3	4	<20°	Manual	4th	Post	Multiple	Multiple	Curved
417		1	No	No	Yes	No	No	No	Yes		No		Correct	Apical	Yes	Yes	34	70	0	1	3	<20°	Manual	4th	Post	Single	Multiple	Curved
488		0	No	No	No	No	No	No	No		No		Correct	No Voids	No	No	13	29	0	1	2	<5°	Manual	4th	Ant	Single	Multiple	straight
362		0	No	No	No	No	No	No	No		No		Correct	Both	Yes	No	13	28	0	1	1	<5°	Rotary	4th	Ant	Single	Single	straight
439		0	No	No	No	No	No	No	No		No		Correct	Apical	Yes	No	25	22	0	1	3	<5°	Manual	4th	Post	Single	Multiple	straight
663		0	No	No	No	No	No	No	No		No		Short	Both	Yes	No	36	20	0	3	4	<20°	Manual	4th	Post	Multiple	Multiple	Curved
114		1	No	No	Yes	No	No	No	Yes		No		Correct	Coronal	Yes	Yes	15	48	0	2	4	<5°	Rotary	4th	Post	Multiple	Multiple	straight
321		1	Yes	No	No	No	No	No	No		No		Correct	Both	Yes	Yes	45	21	0	1	4	<5°	Manual	4th	Post	Single	Multiple	straight
381		1	No	No	No	No	No	Yes	Yes		No		Correct	Apical	Yes	Yes	21	20	0	1	4	<5°	Manual	4th	Ant	Single	Multiple	straight
37		1	No	No	Yes	No	No	No	Yes		No		Correct	Apical	Yes	Yes	24	43	0	2	2	<5°	Manual	4th	Post	Multiple	Multiple	straight
529		1	No	No	Yes	No	No	No	Yes		No		over extended	Apical	Yes	Yes	35	21	0	1	4	<5°	Manual	4th	Post	Single	Multiple	straight
537		0	No	No	No	No	No	No	No		Yes		Correct	Both	Yes	Yes	24	26	0	2	4	<20°	Manual	4th	Post	Multiple	Multiple	Curved
233		0	No	No	No	No	No	No	No		No		Correct	Both	Yes	No	42	29	0	1	2	<5°	Manual	4th	Ant	Single	Multiple	straight
731		1	No	No	Yes	No	No	No	Yes		No		Correct	Coronal	Yes	Yes	15	22	0	1	4	<5°	Manual	4th	Post	Single	Multiple	straight
118		0	No	No	No	No	No	No	No		No		Correct	Coronal	Yes	No	33	42	0	1	4	<5°	Manual	4th	Ant	Single	Multiple	straight
780		0	No	No	No	No	No	No	No		No		Correct	No Voids	No	No	24	45	0	2	4	<20°	Manual	4th	Post	Multiple	Multiple	Curved
722		0	No	No	No	No	No	No	No		No		Correct	Coronal	Yes	No	25	22	0	1	3	≥25°	Manual	4th	Post	Single	Multiple	Curved
410		0	No	No	No	No	No	No	No		No		Correct	No Voids	No	No	43	70	1	1	4	<5°	Manual	4th	Ant	Single	Multiple	straight
253		0	No	No	No	No	No	No	No		No		Correct	Coronal	Yes	No	43	58	0	1	3	<20°	Manual	4th	Ant	Single	Multiple	Curved
479		1	No	Yes	No	No	No	No	No		No		Correct	Both	Yes	Yes	24	45	0	2	4	<5°	Manual	4th	Post	Multiple	Multiple	straight
460		0	No	No	No	No	No	No	No		No		Correct	Apical	Yes	No	14	22	0	2	3	<20°	Manual	4th	Post	Multiple	Multiple	Curved
278		1	No	No	Yes	No	No	No	Yes		No		Correct	Apical	Yes	Yes	11	28	0	1	3	<5°	Manual	4th	Ant	Single	Multiple	straight
352		0	No	No	No	No	No	No	No		No		Correct	Coronal	Yes	No	26	24	0	3	4	<20°	Manual	4th	Post	Multiple	Multiple	Curved
392		1	No	No	Yes	No	No	No	Yes		No		over extended	Apical	Yes	Yes	13	41	0	1	4	<20°	Manual	4th	Ant	Single	Multiple	Curved
769		0	No	No	No	No	No	No	No		No		Correct	No Voids	No	No	11	24	0	1	2	<5°	Manual	4th	Ant	Single	Multiple	straight
483		0	No	No	No	No	No	No	No		No		Correct	No Voids	No	No	13	35	0	1	3	<5°	Manual	4th	Ant	Single	Multiple	straight
765		1	Yes	No	No	No	No	Yes	Yes		No		Short	Both	Yes	Yes	14	39	0	2	2	<20°	Manual	4th	Post	Multiple	Multiple	Curved
119		1	No	No	Yes	No	No	No	Yes		No		Correct	No Voids	No	Yes	14	31	0	2	4	<5°	Manual	4th	Post	Multiple	Multiple	straight
489		0	No	No	No	No	No	No	No		No		Correct	Apical	Yes	No	11	29	0	1	2	<5°	Manual	4th	Ant	Single	Multiple	straight
387		0	No	No	No	No	No	No	No		No		Correct	Coronal	Yes	No	24	24	0	2	4	<20°	Manual	4th	Post	Multiple	Multiple	Curved
76		1	No	No	Yes	No	No	No	Yes		No		Correct	No Voids	No	Yes	43	39	1	1	2	<5°	Manual	4th	Ant	Single	Multiple	straight
630		0	No	No	No	No	No	No	No		No		Correct	No Voids	No	No	43	34	0	1	4	<5°	Manual	4th	Ant	Single	Multiple	straight
117		0	No	No	No	No	No	No	No		No		Correct	Coronal	Yes	No	34	43	0	2	4	<5°	Manual	4th	Post	Multiple	Multiple	straight
535		0	No	No	No	No	No	No	No		No		Correct	Apical	Yes	No	22	23	0	1	2	<5°	Manual	4th	Ant	Single	Multiple	straight
654		0	No	No	No	No	No	No	No		No		Correct	No Voids	No	No	21	24	0	1	3	<5°	Manual	4th	Ant	Single	Multiple	straight
288		0	No	No	No	No	No	No	No		No		Correct	Apical	Yes	No	23	24	0	1	4	<20°	Manual	4th	Ant	Single	Multiple	Curved
754		0	No	No	No	No	No	No	No		No		Correct	No Voids	No	No	43	63	0	1	2	<5°	Manual	4th	Ant	Single	Multiple	straight
702		0	No	No	No	No	No	No	No		No		Correct	No Voids	No	No	12	28	0	1	3	<5°	Manual	4th	Ant	Single	Multiple	straight
34		1	Yes	No	No	No	No	No	No		No		Short	No Voids	No	Yes	24	34	0	2	3	<5°	Manual	4th	Post	Multiple	Multiple	straight
638		1	No	No	Yes	No	No	No	Yes		No		Correct	No Voids	No	Yes	11	35	0	1	3	<5°	Manual	4th	Ant	Single	Multiple	straight
443		1	No	No	Yes	No	No	No	Yes		No		over extended	Both	Yes	Yes	21	23	0	1	3	<5°	Manual	4th	Ant	Single	Multiple	straight
23		1	No	No	No	No	No	Yes	Yes		No		Correct	Apical	Yes	Yes	15	45	0	1	4	<20°	Manual	4th	Post	Single	Multiple	Curved
182		1	No	No	Yes	No	No	No	Yes		No		Correct	Apical	Yes	Yes	22	62	0	1	2	<5°	Manual	4th	Ant	Single	Multiple	straight
452		1	No	No	Yes	No	No	No	Yes		No		Short	Coronal	Yes	Yes	46	23	0	3	4	<20°	Manual	4th	Post	Multiple	Multiple	Curved
547		0	No	No	No	No	No	No	No		No		Correct	Coronal	Yes	No	26	24	0	3	4	≥25°	Rotary	4th	Post	Multiple	Multiple	Curved
320		0	No	No	No	No	No	No	No		No		Correct	Apical	Yes	No	22	22	0	1	3	<5°	Manual	4th	Ant	Single	Multiple	straight
18		0	No	No	No	No	No	No	No		No		Correct	No Voids	No	No	14	43	0	2	2	<20°	Rotary	4th	Post	Multiple	Multiple	Curved
89		0	No	No	No	No	No	No	No		No		Correct	No Voids	No	No	21	62	0	1	2	<5°	Manual	4th	Ant	Single	Multiple	straight
521		1	No	No	Yes	No	No	No	Yes		No		Correct	Apical	Yes	Yes	12	50	1	1	4	<5°	Manual	4th	Ant	Single	Multiple	straight
593		1	No	No	Yes	No	No	No	Yes		No		Correct	No Voids	No	Yes	34	46	0	1	3	<20°	Manual	4th	Post	Single	Multiple	Curved
700		0	No	No	No	No	No	No	No		No		Correct	Apical	Yes	No	35	25	0	1	2	<5°	Manual	4th	Post	Single	Multiple	straight
391		0	No	No	No	No	No	No	No		No		Correct	Both	Yes	No	11	53	0	1	2	<5°	Manual	4th	Ant	Single	Multiple	straight
373		0	No	No	No	No	No	No	No		No		Correct	Apical	Yes	No	11	27	0	1	2	<5°	Manual	4th	Ant	Single	Multiple	straight
577		1	No	Yes	No	No	No	No	No		No		Correct	No Voids	No	Yes	44	31	0	1	3	<5°	Manual	4th	Post	Single	Multiple	straight
486		0	No	No	No	No	No	No	No		No		Correct	Coronal	Yes	No	45	36	0	1	3	<5°	Manual	4th	Post	Single	Multiple	straight
624		0	No	No	No	No	No	No	No		No		Correct	Apical	Yes	No	21	24	0	1	3	<5°	Manual	4th	Ant	Single	Multiple	straight
697		0	No	No	No	No	No	No	No		No		Correct	Apical	Yes	No	34	71	0	1	3	<5°	Manual	4th	Post	Single	Multiple	straight
494		0	No	No	No	No	No	No	No		No		Correct	No Voids	No	No	13	40	0	1	3	<5°	Manual	4th	Ant	Single	Multiple	straight
538		0	No	No	No	No	No	No	No		No		Correct	No Voids	No	No	44	46	0	1	4	<5°	Manual	4th	Post	Single	Multiple	straight
499		0	No	No	No	No	No	No	No		No		Correct	Coronal	Yes	No	35	72	0	1	3	<5°	Manual	4th	Post	Single	Multiple	straight
468		0	No	No	No	No	No	No	No		No		Correct	No Voids	No	No	22	17	0	1	2	<5°	Manual	4th	Ant	Single	Multiple	straight
513		0	No	No	No	No	No	No	No		No		Correct	Coronal	Yes	No	32	26	1	1	2	<5°	Manual	4th	Ant	Single	Multiple	straight
207		0	No	No	No	No	No	No	No		No		Correct	No Voids	No	No	15	25	0	1	3	<5°	Manual	4th	Post	Single	Multiple	straight
507		0	No	No	No	No	No	No	No		No		over extended	Apical	Yes	No	23	27	0	1	4	<20°	Manual	4th	Ant	Single	Multiple	Curved
730		0	No	No	No	No	No	No	No		No		Correct	No Voids	No	No	13	45	0	1	3	<20°	Rotary	4th	Ant	Single	Multiple	Curved
792		0	No	No	No	No	No	No	No		No		Correct	No Voids	No	No	13	48	0	1	2	<20°	Manual	4th	Ant	Single	Multiple	Curved
289		1	No	No	Yes	No	No	No	Yes		No		over extended	No Voids	No	Yes	15	19	0	1	4	<5°	Manual	4th	Post	Single	Multiple	straight
55		1	No	Yes	No	No	No	No	No		No		Correct	No Voids	No	Yes	23	47	0	1	2	<5°	Manual	4th	Ant	Single	Multiple	straight
433		0	No	No	No	No	No	No	No		No		Correct	No Voids	No	No	13	37	0	1	3	<20°	Manual	4th	Ant	Single	Multiple	Curved
389		0	No	No	No	No	No	No	No		No		Correct	Both	Yes	No	23	26	0	1	4	<5°	Manual	4th	Ant	Single	Multiple	straight
239		1	No	No	Yes	No	No	No	Yes		No		Correct	Coronal	Yes	Yes	25	31	0	1	3	<5°	Manual	4th	Post	Single	Multiple	straight
461		0	No	No	No	No	No	No	No		No		Correct	Apical	Yes	No	15	37	0	2	4	<5°	Manual	4th	Post	Multiple	Multiple	straight
738		0	No	No	No	No	No	No	No		No		Correct	No Voids	No	No	25	34	0	1	3	<5°	Manual	4th	Post	Single	Multiple	straight
644		0	No	No	No	No	No	No	No		No		Correct	Apical	Yes	No	45	24	0	1	4	<5°	Manual	4th	Post	Single	Multiple	straight
666		1	No	No	Yes	No	No	No	Yes		No		over extended	No Voids	No	Yes	35	47	0	1	2	<5°	Manual	4th	Post	Single	Multiple	straight
592		0	No	No	No	No	No	No	No		No		Correct	Both	Yes	No	14	36	0	2	4	<5°	Manual	4th	Post	Multiple	Multiple	straight
217		1	No	No	Yes	No	No	No	Yes		No		Correct	No Voids	No	Yes	21	22	0	1	3	<5°	Manual	4th	Ant	Single	Multiple	straight
653		1	No	No	Yes	No	No	No	Yes		No		over extended	No Voids	No	Yes	15	22	0	1	3	<5°	Manual	4th	Post	Single	Multiple	straight
249		0	No	No	No	No	No	No	No		No		Correct	Both	Yes	No	21	26	0	1	2	<20°	Manual	4th	Ant	Single	Multiple	Curved
526		0	No	No	No	No	No	No	No		No		Correct	Apical	Yes	No	24	40	0	2	3	<20°	Manual	4th	Post	Multiple	Multiple	Curved
583		0	No	No	No	No	No	No	No		No		Correct	No Voids	No	No	43	45	0	1	3	<20°	Manual	4th	Ant	Single	Multiple	Curved
168		0	No	No	No	No	No	No	No		No		Correct	No Voids	No	No	34	45	0	1	3	<20°	Manual	4th	Post	Single	Multiple	Curved
337		1	No	No	No	No	No	Yes	Yes		No		Short	No Voids	No	Yes	23	26	0	1	3	<20°	Manual	4th	Ant	Single	Multiple	Curved
125		1	No	No	Yes	No	No	No	Yes		No		over extended	Apical	Yes	Yes	14	15	0	2	3	<5°	Manual	4th	Post	Multiple	Multiple	straight
527		0	No	No	No	No	No	No	No		No		Correct	No Voids	No	No	43	42	0	1	3	<5°	Manual	4th	Ant	Single	Multiple	straight
8		1	No	No	Yes	No	No	No	Yes		No		Correct	No Voids	No	Yes	35	26	0	1	3	<5°	Manual	4th	Post	Single	Multiple	straight
175		0	No	No	No	No	No	No	No		No		Correct	Apical	Yes	No	11	29	0	1	2	<5°	Manual	4th	Ant	Single	Multiple	straight
229		1	No	Yes	Yes	No	No	No	Yes		No		Correct	Apical	Yes	Yes	15	22	0	1	4	<20°	Manual	4th	Post	Single	Multiple	Curved
287		1	No	Yes	No	No	No	No	No		No		over extended	No Voids	No	Yes	45	35	0	1	4	<5°	Manual	4th	Post	Single	Multiple	straight
46		0	No	No	No	No	No	No	No		Yes		over extended	Apical	Yes	Yes	46	21	0	3	4	≥25°	Rotary	4th	Post	Multiple	Multiple	Curved
137		0	No	No	No	No	No	No	No		No		Correct	Apical	Yes	No	13	36	0	1	2	<5°	Manual	4th	Ant	Single	Multiple	straight
78		1	No	No	Yes	No	No	No	Yes		No		Correct	Apical	Yes	Yes	25	47	0	2	3	<5°	Manual	4th	Post	Multiple	Multiple	straight
180		0	No	No	No	No	No	No	No		No		Correct	No Voids	No	No	43	48	0	1	2	<5°	Manual	4th	Ant	Single	Multiple	straight
643		0	No	No	No	No	No	No	No		No		Correct	No Voids	No	No	15	26	0	2	4	<5°	Manual	4th	Post	Multiple	Multiple	straight
214		1	No	No	Yes	No	No	No	Yes		No		Correct	No Voids	No	Yes	45	41	0	1	4	<5°	Manual	4th	Post	Single	Multiple	straight
608		0	No	No	No	No	No	No	No		No		Correct	Both	Yes	No	13	57	1	1	4	<5°	Manual	4th	Ant	Single	Multiple	straight
10		1	No	No	No	No	No	Yes	Yes		No		Short	Apical	Yes	Yes	15	26	0	1	3	≥25°	Manual	4th	Post	Single	Multiple	Curved
600		0	No	No	No	No	No	No	No		No		Correct	No Voids	No	No	21	41	0	1	1	≥25°	Manual	4th	Ant	Single	Single	Curved
796		1	No	No	Yes	No	No	No	Yes		No		over extended	No Voids	No	Yes	22	26	0	1	3	<5°	Manual	4th	Ant	Single	Multiple	straight
462		1	No	No	Yes	No	No	No	Yes		No		over extended	No Voids	No	Yes	11	21	0	1	2	<5°	Manual	4th	Ant	Single	Multiple	straight
203		0	No	No	No	No	No	No	No		No		Correct	No Voids	No	No	14	19	0	2	3	<5°	Manual	4th	Post	Multiple	Multiple	straight
619		1	No	No	Yes	No	No	No	Yes		No		over extended	No Voids	No	Yes	36	24	0	3	3	<20°	Manual	4th	Post	Multiple	Multiple	Curved
90		0	No	No	No	No	No	No	No		No		Correct	No Voids	No	No	24	33	0	1	3	<5°	Manual	4th	Post	Single	Multiple	straight
135		1	No	No	Yes	No	No	No	Yes		No		Correct	No Voids	No	Yes	23	31	0	1	3	<5°	Manual	4th	Ant	Single	Multiple	straight
639		1	No	No	Yes	No	No	No	Yes		No		Correct	Both	Yes	Yes	36	14	0	3	4	<20°	Manual	4th	Post	Multiple	Multiple	Curved
568		0	No	No	No	No	No	No	No		No		Correct	Coronal	Yes	No	23	62	1	1	4	<5°	Manual	4th	Ant	Single	Multiple	straight
32		1	Yes	No	No	No	No	No	No		No		Correct	Apical	Yes	Yes	43	22	0	1	3	<20°	Manual	4th	Ant	Single	Multiple	Curved
250		1	No	No	Yes	No	No	No	Yes		No		Correct	No Voids	No	Yes	37	46	0	2	4	<5°	Manual	4th	Post	Multiple	Multiple	straight
40		1	No	No	Yes	No	No	No	Yes		No		Correct	No Voids	No	Yes	46	49	0	4	4	<20°	Manual	4th	Post	Multiple	Multiple	Curved
550		1	No	No	Yes	No	No	No	Yes		No		Correct	No Voids	No	Yes	12	30	0	1	3	<5°	Manual	4th	Ant	Single	Multiple	straight
657		1	No	No	Yes	No	No	No	Yes		No		Correct	No Voids	No	Yes	35	38	0	1	3	<20°	Manual	4th	Post	Single	Multiple	Curved
777		0	No	No	No	No	No	No	No		No		Correct	No Voids	No	No	43	34	0	1	3	<5°	Manual	4th	Ant	Single	Multiple	straight
640		0	No	No	No	No	No	No	No		No		Correct	Apical	Yes	No	13	32	0	1	4	<20°	Manual	4th	Ant	Single	Multiple	Curved
671		0	No	No	No	No	No	No	No		No		Correct	Apical	Yes	No	25	45	0	1	4	<20°	Manual	4th	Post	Single	Multiple	Curved
571		1	No	No	Yes	No	No	No	Yes		No		over extended	No Voids	No	Yes	45	26	0	1	3	<5°	Manual	4th	Post	Single	Multiple	straight
572		0	No	No	No	No	No	No	No		No		Correct	Both	Yes	No	11	22	0	1	3	<5°	Manual	4th	Ant	Single	Multiple	straight
390		0	No	No	No	No	No	No	No		No		Correct	Apical	Yes	No	26	29	0	3	4	<20°	Manual	4th	Post	Multiple	Multiple	Curved
326		1	No	No	Yes	No	No	No	Yes		No		Correct	No Voids	No	Yes	11	35	0	1	4	<5°	Manual	4th	Ant	Single	Multiple	straight
189		1	No	No	Yes	No	No	No	Yes		No		Correct	No Voids	No	Yes	23	57	1	1	3	<5°	Manual	4th	Ant	Single	Multiple	straight
265		0	No	No	No	No	No	No	No		No		Correct	Apical	Yes	No	43	45	0	1	2	<5°	Manual	4th	Ant	Single	Multiple	straight
450		1	No	No	No	No	No	Yes	Yes		No		Correct	No Voids	No	Yes	15	43	0	1	4	<5°	Manual	4th	Post	Single	Multiple	straight
496		1	Yes	No	No	No	No	No	No		No		Correct	Apical	Yes	Yes	43	69	0	1	3	<5°	Manual	4th	Ant	Single	Multiple	straight
680		0	No	No	No	No	No	No	No		No		Correct	No Voids	No	No	12	41	0	1	3	<5°	Manual	4th	Ant	Single	Multiple	straight
779		0	No	No	No	No	No	No	No		No		Correct	No Voids	No	No	21	35	0	1	3	<5°	Manual	4th	Ant	Single	Multiple	straight
139		1	No	No	No	No	No	Yes	Yes		No		Correct	Apical	Yes	Yes	45	73	0	1	3	<20°	Manual	4th	Post	Single	Multiple	Curved
136		1	No	No	Yes	No	No	No	Yes		No		Correct	Apical	Yes	Yes	11	26	0	1	3	<20°	Manual	4th	Ant	Single	Multiple	Curved
258		0	No	No	No	No	No	No	No		No		Correct	Apical	Yes	No	43	53	0	1	3	<5°	Manual	4th	Ant	Single	Multiple	straight
50		1	Yes	No	No	No	No	No	No		No		Correct	No Voids	No	Yes	43	41	0	1	3	<20°	Manual	4th	Ant	Single	Multiple	Curved
386		1	No	No	No	No	No	Yes	Yes		No		Short	No Voids	No	Yes	24	33	0	2	4	<20°	Manual	4th	Post	Multiple	Multiple	Curved
396		0	No	No	No	No	No	No	No		No		Correct	No Voids	No	No	37	29	0	4	4	≥25°	Manual	4th	Post	Multiple	Multiple	Curved
80		1	No	No	Yes	No	No	No	Yes		No		Correct	Apical	Yes	Yes	33	53	0	1	3	<5°	Manual	4th	Ant	Single	Multiple	straight
130		0	No	No	No	No	No	No	No		No		Correct	Apical	Yes	No	15	66	1	1	3	<5°	Manual	4th	Post	Single	Multiple	straight
129		0	No	No	No	No	No	No	No		No		Correct	No Voids	No	No	13	18	0	1	3	<5°	Manual	4th	Ant	Single	Multiple	straight
394		0	No	No	No	No	No	No	No		No		Correct	No Voids	No	No	12	23	0	1	2	<20°	Manual	4th	Ant	Single	Multiple	Curved
192		0	No	No	No	No	No	No	No		No		Correct	No Voids	No	No	33	52	0	1	3	<20°	Manual	4th	Ant	Single	Multiple	Curved
322		0	No	No	No	No	No	No	No		No		Correct	Apical	Yes	No	15	23	0	1	3	<20°	Manual	4th	Post	Single	Multiple	Curved
240		1	No	No	Yes	No	No	No	Yes		No		over extended	Both	Yes	Yes	22	44	0	1	4	<5°	Manual	4th	Ant	Single	Multiple	straight
605		1	No	No	Yes	No	No	No	Yes		No		Correct	No Voids	No	Yes	11	38	0	1	3	<5°	Manual	4th	Ant	Single	Multiple	straight
701		1	No	No	Yes	No	No	No	Yes		No		over extended	Both	Yes	Yes	32	50	0	1	3	<5°	Manual	4th	Ant	Single	Multiple	straight
745		0	No	No	No	No	No	No	No		No		Correct	No Voids	No	No	13	61	0	1	3	<5°	Manual	4th	Ant	Single	Multiple	straight
589		0	No	No	No	No	No	No	No		No		Correct	No Voids	No	No	34	41	0	1	4	<20°	Manual	4th	Post	Single	Multiple	Curved
596		0	No	No	No	No	No	No	No		No		Correct	No Voids	No	No	22	62	0	1	2	<5°	Manual	4th	Ant	Single	Multiple	straight
449		1	Yes	No	No	No	No	No	No		No		Correct	Coronal	Yes	Yes	22	24	0	1	3	<20°	Manual	4th	Ant	Single	Multiple	Curved
69		0	No	No	No	No	No	No	No		No		Correct	No Voids	No	No	13	47	0	1	2	<5°	Manual	4th	Ant	Single	Multiple	straight
603		1	No	No	Yes	No	No	No	Yes		No		over extended	No Voids	No	Yes	14	20	0	2	4	<5°	Manual	4th	Post	Multiple	Multiple	straight
404		1	No	No	Yes	No	No	No	Yes		No		Correct	No Voids	No	Yes	31	32	0	1	4	<5°	Manual	4th	Ant	Single	Multiple	straight
675		0	No	No	No	No	No	No	No		No		Correct	No Voids	No	No	24	23	0	2	4	<20°	Manual	4th	Post	Multiple	Multiple	Curved
9		0	No	No	No	No	No	No	No		No		Correct	No Voids	No	No	43	54	0	1	3	<5°	Manual	5th	Ant	Single	Multiple	straight
781		1	No	No	Yes	No	No	No	Yes		No		over extended	No Voids	No	Yes	44	20	0	1	4	<20°	Manual	4th	Post	Single	Multiple	Curved
733		0	No	No	No	No	No	No	No		No		Correct	No Voids	No	No	33	31	0	1	2	<5°	Manual	4th	Ant	Single	Multiple	straight
279		0	No	No	No	No	No	No	No		No		Correct	No Voids	No	No	45	47	0	1	2	<5°	Manual	4th	Post	Single	Multiple	straight
92		1	No	No	Yes	No	No	No	Yes		No		Correct	No Voids	No	Yes	14	23	0	2	3	<20°	Manual	4th	Post	Multiple	Multiple	Curved
266		0	No	No	No	No	No	No	No		No		Correct	No Voids	No	No	11	34	0	1	3	<5°	Manual	4th	Ant	Single	Multiple	straight
268		1	No	No	Yes	No	No	No	Yes		No		over extended	Both	Yes	Yes	32	59	0	1	3	<5°	Manual	4th	Ant	Single	Multiple	straight
15		0	No	No	No	No	No	No	No		No		Correct	Both	Yes	No	17	47	1	3	4	<20°	Rotary	4th	Post	Multiple	Multiple	Curved
704		1	No	Yes	No	No	No	No	No		No		over extended	No Voids	No	Yes	22	46	0	1	3	<20°	Manual	4th	Ant	Single	Multiple	Curved
86		0	No	No	No	No	No	No	No		No		Correct	No Voids	No	No	16	25	0	3	3	≥25°	Manual	4th	Post	Multiple	Multiple	Curved
661		1	No	No	Yes	Yes	No	No	Yes		No		Correct	No Voids	No	Yes	46	22	0	3	4	<5°	Manual	4th	Post	Multiple	Multiple	straight
290		0	No	No	No	No	No	No	No		No		Correct	No Voids	No	No	24	45	0	2	4	<20°	Manual	4th	Post	Multiple	Multiple	Curved
171		0	No	No	No	No	No	No	No		No		Correct	No Voids	No	No	21	59	0	1	3	<5°	Manual	4th	Ant	Single	Multiple	straight
719		1	No	No	Yes	No	No	No	Yes		No		Correct	No Voids	No	Yes	21	22	0	1	3	<5°	Manual	4th	Ant	Single	Multiple	straight
81		0	No	No	No	No	No	No	No		No		Correct	Both	Yes	No	12	46	0	1	4	<5°	Manual	4th	Ant	Single	Multiple	straight
555		0	No	No	No	No	No	No	No		No		Correct	Both	Yes	No	11	16	0	1	4	<5°	Manual	4th	Ant	Single	Multiple	straight
623		0	No	No	No	No	No	No	No		No		Short	No Voids	No	No	12	40	0	1	3	<5°	Manual	4th	Ant	Single	Multiple	straight
574		0	No	No	No	No	No	No	No		No		Correct	Coronal	Yes	No	33	46	0	1	3	<5°	Manual	4th	Ant	Single	Multiple	straight
739		0	No	No	No	No	No	No	No		No		Short	No Voids	No	No	35	24	0	1	4	<5°	Manual	4th	Post	Single	Multiple	straight
456		1	No	Yes	No	No	No	No	No		No		Correct	Coronal	Yes	Yes	34	29	0	2	4	<20°	Manual	4th	Post	Multiple	Multiple	Curved
12		1	No	No	Yes	No	No	No	Yes		No		Correct	No Voids	No	Yes	31	23	0	1	3	<5°	Manual	4th	Ant	Single	Multiple	straight
519		0	No	No	No	No	No	No	No		No		Correct	Apical	Yes	No	11	22	0	2	3	<5°	Manual	4th	Ant	Multiple	Multiple	straight
204		1	No	No	Yes	No	No	No	Yes		No		Correct	No Voids	No	Yes	11	23	0	1	3	<5°	Manual	4th	Ant	Single	Multiple	straight
800		0	No	No	No	No	No	No	No		No		Correct	No Voids	No	No	42	46	0	1	3	<5°	Manual	4th	Ant	Single	Multiple	straight
453		1	No	No	Yes	No	Yes	No	Yes		No		Correct	No Voids	No	Yes	47	35	0	3	3	<20°	Manual	4th	Post	Multiple	Multiple	Curved
346		0	No	No	No	No	No	No	No		No		Correct	Apical	Yes	No	44	57	0	1	4	<5°	Manual	4th	Post	Single	Multiple	straight
673		1	No	No	Yes	No	No	No	Yes		No		Correct	No Voids	No	Yes	13	42	0	1	3	<5°	Manual	4th	Ant	Single	Multiple	straight
72		1	No	Yes	No	No	No	No	No		No		Correct	No Voids	No	Yes	21	24	0	1	2	<5°	Manual	4th	Ant	Single	Multiple	straight
784		1	No	No	Yes	No	No	No	Yes		No		Correct	No Voids	No	Yes	34	45	0	1	4	<5°	Manual	4th	Post	Single	Multiple	straight
176		1	No	No	Yes	No	No	No	Yes		No		Correct	Apical	Yes	Yes	45	35	0	1	3	<20°	Rotary	4th	Post	Single	Multiple	Curved
226		1	Yes	No	Yes	No	No	No	Yes		No		Correct	Both	Yes	Yes	36	46	0	4	4	≥25°	Manual	4th	Post	Multiple	Multiple	Curved
437		1	No	No	Yes	No	No	No	Yes		No		over extended	No Voids	No	Yes	46	25	0	3	4	<20°	Manual	5th	Post	Multiple	Multiple	Curved
787		0	No	No	No	No	No	No	No		No		Correct	No Voids	No	No	14	36	0	2	4	<5°	Manual	5th	Post	Multiple	Multiple	straight
622		0	No	No	No	No	No	No	No		No		Short	No Voids	No	No	14	26	1	1	3	<5°	Rotary	5th	Post	Single	Multiple	straight
71		0	No	No	No	No	No	No	No		No		Correct	No Voids	No	No	12	30	0	1	1	<5°	Manual	5th	Ant	Single	Single	straight
49		1	No	No	Yes	No	No	No	Yes		No		Correct	Both	Yes	Yes	46	70	0	3	3	<20°	Manual	5th	Post	Multiple	Multiple	Curved
371		0	No	No	No	No	No	No	No		No		Correct	No Voids	No	No	45	45	0	1	3	<5°	Manual	5th	Post	Single	Multiple	straight
724		0	No	No	No	No	No	No	No		No		Correct	Both	Yes	No	34	19	0	1	3	<5°	Manual	5th	Post	Single	Multiple	straight
458		0	No	No	No	No	No	No	No		No		Correct	Both	Yes	No	36	23	0	4	4	<20°	Manual	5th	Post	Multiple	Multiple	Curved
720		0	No	No	No	No	No	No	No		No		Correct	Coronal	Yes	No	26	37	0	3	2	≥25°	Rotary	5th	Post	Multiple	Multiple	Curved
234		1	No	No	Yes	No	No	No	Yes		No		over extended	No Voids	No	Yes	23	46	1	1	2	<5°	Rotary	5th	Ant	Single	Multiple	straight
511		1	No	No	Yes	No	No	No	Yes		No		over extended	Apical	Yes	Yes	21	43	0	1	2	<5°	Manual	5th	Ant	Single	Multiple	straight
758		1	No	No	No	No	No	Yes	Yes		No		over extended	No Voids	No	Yes	47	32	1	3	3	<5°	Manual	4th	Post	Multiple	Multiple	straight
384		0	No	No	No	No	No	No	No		No		Correct	No Voids	No	No	17	41	0	3	4	<20°	Rotary	5th	Post	Multiple	Multiple	Curved
545		1	No	No	Yes	No	No	No	Yes		No		over extended	Coronal	Yes	Yes	15	21	0	1	1	<5°	Manual	5th	Post	Single	Single	straight
602		0	No	No	No	No	No	No	No		No		Correct	No Voids	No	No	25	44	0	1	2	<5°	Manual	5th	Post	Single	Multiple	straight
609		1	No	No	Yes	No	No	No	Yes		No		Correct	No Voids	No	Yes	46	20	0	3	3	<5°	Rotary	5th	Post	Multiple	Multiple	straight
607		1	No	No	Yes	No	No	No	Yes		No		over extended	No Voids	No	Yes	37	25	0	3	3	<20°	Manual	5th	Post	Multiple	Multiple	Curved
84		0	No	No	No	No	No	No	No		No		Correct	Coronal	Yes	No	44	46	0	1	2	<20°	Rotary	5th	Post	Single	Multiple	Curved
505		1	No	No	Yes	No	No	No	Yes		No		over extended	Both	Yes	Yes	24	43	0	2	4	<20°	Manual	5th	Post	Multiple	Multiple	Curved
112		1	Yes	No	No	No	No	No	No		No		Short	No Voids	No	Yes	17	21	0	3	3	≥25°	Manual	5th	Post	Multiple	Multiple	Curved
523		0	No	No	No	No	No	No	No		No		Correct	No Voids	No	No	17	57	0	3	4	≥25°	Manual	5th	Post	Multiple	Multiple	Curved
693		1	No	No	No	No	No	Yes	Yes		No		Short	Coronal	Yes	Yes	14	32	0	1	4	≥25°	Manual	5th	Post	Single	Multiple	Curved
157		0	No	No	No	No	No	No	No		No		Correct	No Voids	No	No	35	47	0	1	3	<5°	Rotary	5th	Post	Single	Multiple	straight
93		0	No	No	No	No	No	No	No		No		Correct	No Voids	No	No	31	19	0	1	1	<5°	Manual	5th	Ant	Single	Single	straight
38		1	No	No	No	No	Yes	No	Yes		No		Correct	No Voids	No	Yes	47	25	0	3	2	<20°	Rotary	5th	Post	Multiple	Multiple	Curved
13		0	No	No	No	No	No	No	No		No		Correct	No Voids	No	No	37	21	0	3	3	<20°	Manual	5th	Post	Multiple	Multiple	Curved
647		1	No	No	Yes	No	No	No	Yes		No		over extended	No Voids	No	Yes	36	22	0	3	3	<20°	Manual	5th	Post	Multiple	Multiple	Curved
54		1	No	No	Yes	No	No	No	Yes		No		Correct	No Voids	No	Yes	46	41	0	3	3	≥25°	Rotary	5th	Post	Multiple	Multiple	Curved
748		0	No	No	No	No	No	No	No		No		Correct	No Voids	No	No	25	20	0	2	4	<5°	Manual	5th	Post	Multiple	Multiple	straight
187		0	No	No	No	No	No	No	No		No		Correct	No Voids	No	No	22	31	0	1	2	<5°	Manual	5th	Ant	Single	Multiple	straight
495		1	No	No	Yes	No	No	No	Yes		No		Correct	Apical	Yes	Yes	47	25	0	3	2	<20°	Rotary	5th	Post	Multiple	Multiple	Curved
562		1	No	No	Yes	No	No	No	Yes		No		over extended	Coronal	Yes	Yes	26	38	0	4	3	<5°	Rotary	5th	Post	Multiple	Multiple	straight
275		0	No	No	No	No	No	No	No		No		Correct	Apical	Yes	No	16	30	0	3	4	<20°	Rotary	5th	Post	Multiple	Multiple	Curved
323		0	No	No	No	No	No	No	No		No		Correct	Both	Yes	No	36	25	0	4	4	≥25°	Rotary	5th	Post	Multiple	Multiple	Curved
82		0	No	No	No	No	No	No	No		No		Correct	Both	Yes	No	37	24	0	3	4	<20°	Manual	5th	Post	Multiple	Multiple	Curved
393		0	No	No	No	No	No	No	No		No		Correct	Apical	Yes	No	47	64	0	2	3	<20°	Manual	5th	Post	Multiple	Multiple	Curved
48		0	No	No	No	No	No	No	No		No		Correct	No Voids	No	No	44	59	0	1	3	<5°	Manual	5th	Post	Single	Multiple	straight
482		0	No	No	No	No	No	No	No		No		over extended	No Voids	No	No	34	66	1	1	3	<5°	Manual	5th	Post	Single	Multiple	straight
14		0	No	No	No	No	No	No	No		No		Correct	Apical	Yes	No	47	35	0	2	3	≥25°	Rotary	5th	Post	Multiple	Multiple	Curved
753		1	No	No	Yes	No	No	No	Yes		No		Correct	No Voids	No	Yes	15	30	0	1	2	<5°	Manual	5th	Post	Single	Multiple	straight
620		0	No	No	No	No	No	No	No		No		Correct	No Voids	No	No	16	45	0	3	3	≥25°	Manual	5th	Post	Multiple	Multiple	Curved
682		0	No	No	No	No	No	No	No		No		Correct	Apical	Yes	No	46	23	0	4	2	≥25°	Rotary	5th	Post	Multiple	Multiple	Curved
467		0	No	No	No	No	No	No	No		No		Correct	No Voids	No	No	46	23	0	4	4	≥25°	Manual	5th	Post	Multiple	Multiple	Curved
401		0	No	No	No	No	No	No	No		No		Correct	No Voids	No	No	17	26	0	3	4	≥25°	Rotary	5th	Post	Multiple	Multiple	Curved
45		1	No	No	Yes	No	No	No	Yes		No		over extended	Apical	Yes	Yes	16	40	0	3	4	<20°	Manual	5th	Post	Multiple	Multiple	Curved
480		1	Yes	No	No	No	No	No	No		No		Correct	No Voids	No	Yes	24	51	0	2	3	<20°	Rotary	5th	Post	Multiple	Multiple	Curved
629		1	No	No	Yes	No	No	No	Yes		No		over extended	No Voids	No	Yes	42	30	0	1	3	<5°	Manual	5th	Ant	Single	Multiple	straight
186		0	No	No	No	No	No	No	No		No		Correct	No Voids	No	No	14	48	0	2	2	<5°	Manual	5th	Post	Multiple	Multiple	straight
734		1	No	No	Yes	No	No	No	Yes		No		Short	No Voids	No	Yes	22	23	0	1	1	≥25°	Manual	5th	Ant	Single	Single	Curved
463		0	No	No	No	No	No	No	No		No		Correct	No Voids	No	No	25	21	0	1	3	≥25°	Rotary	5th	Post	Single	Multiple	Curved
397		0	No	No	No	No	No	No	No		No		Correct	No Voids	No	No	44	47	0	1	2	<5°	Rotary	5th	Post	Single	Multiple	straight
446		0	No	No	No	No	No	No	No		No		Correct	Coronal	Yes	No	34	46	0	1	3	<5°	Manual	5th	Post	Single	Multiple	straight
68		0	No	No	No	No	No	No	No		No		Correct	Apical	Yes	No	34	45	0	1	2	<20°	Manual	5th	Post	Single	Multiple	Curved
418		1	No	No	Yes	No	No	No	Yes		No		over extended	Apical	Yes	Yes	11	28	0	1	2	<5°	Rotary	5th	Ant	Single	Multiple	straight
403		1	No	Yes	Yes	No	No	No	Yes		No		Correct	Apical	Yes	Yes	14	45	0	2	3	<5°	Manual	5th	Post	Multiple	Multiple	straight
62		1	No	No	Yes	No	No	No	Yes		No		over extended	Coronal	Yes	Yes	45	48	0	1	2	<5°	Manual	5th	Post	Single	Multiple	straight
59		0	No	No	No	No	No	No	No		No		Correct	No Voids	No	No	16	47	0	3	4	<20°	Rotary	5th	Post	Multiple	Multiple	Curved
804		1	No	No	Yes	No	No	No	Yes		Yes		over extended	No Voids	No	Yes	36	21	0	4	4	≥25°	Manual	5th	Post	Multiple	Multiple	Curved
143		1	No	No	Yes	No	No	No	Yes		Yes		Short	Coronal	Yes	Yes	46	27	0	4	4	<20°	Manual	5th	Post	Multiple	Multiple	Curved
156		0	No	No	No	No	No	No	No		No		Correct	Both	Yes	No	16	20	0	3	4	<5°	Manual	5th	Post	Multiple	Multiple	straight
744		0	No	No	No	No	No	No	No		No		Correct	No Voids	No	No	15	25	0	1	4	<5°	Manual	5th	Post	Single	Multiple	straight
428		1	No	No	Yes	No	No	No	Yes		No		over extended	Both	Yes	Yes	24	27	0	2	4	<5°	Manual	5th	Post	Multiple	Multiple	straight
361		0	No	No	No	No	No	No	No		No		Correct	No Voids	No	No	35	28	0	1	3	<5°	Rotary	5th	Post	Single	Multiple	straight
783		0	No	No	No	No	No	No	No		No		Correct	No Voids	No	No	45	22	0	1	4	<5°	Manual	5th	Post	Single	Multiple	straight
169		1	No	No	Yes	No	No	No	Yes		No		Correct	No Voids	No	Yes	16	38	0	3	3	<20°	Rotary	5th	Post	Multiple	Multiple	Curved
788		1	No	No	Yes	No	No	No	Yes		No		Correct	No Voids	No	Yes	46	45	0	3	4	<20°	Rotary	5th	Post	Multiple	Multiple	Curved
242		1	No	No	Yes	No	No	No	Yes		No		over extended	Both	Yes	Yes	26	27	0	3	4	≥25°	Manual	5th	Post	Multiple	Multiple	Curved
31		0	No	No	No	No	No	No	No		No		Correct	No Voids	No	No	26	23	0	3	4	<20°	Rotary	5th	Post	Multiple	Multiple	Curved
246		1	No	No	Yes	No	No	No	Yes		No		Correct	Both	Yes	Yes	14	22	0	2	4	<5°	Manual	5th	Post	Multiple	Multiple	straight
485		1	No	No	Yes	No	No	No	Yes		No		over extended	Apical	Yes	Yes	24	36	0	2	4	<5°	Manual	5th	Post	Multiple	Multiple	straight
440		0	No	No	No	No	No	No	No		No		Correct	Apical	Yes	No	15	25	0	1	2	<5°	Manual	5th	Post	Single	Multiple	straight
331		0	No	No	No	No	No	No	No		Yes		Correct	No Voids	No	Yes	16	23	0	3	4	≥25°	Rotary	5th	Post	Multiple	Multiple	Curved
301		0	No	No	No	No	No	No	No		No		Correct	Coronal	Yes	No	24	41	0	1	2	<5°	Manual	5th	Post	Single	Multiple	straight
662		0	No	No	No	No	No	No	No		No		Correct	No Voids	No	No	25	22	0	1	4	≥25°	Manual	5th	Post	Single	Multiple	Curved
430		0	No	No	No	No	No	No	No		No		Correct	No Voids	No	No	24	37	0	2	4	<20°	Rotary	5th	Post	Multiple	Multiple	Curved
51		0	No	No	No	No	No	No	No		No		Correct	Coronal	Yes	No	24	19	0	2	2	<5°	Manual	5th	Post	Multiple	Multiple	straight
714		0	No	No	No	No	No	No	No		Yes		Correct	No Voids	No	Yes	14	30	0	2	4	<5°	Manual	5th	Post	Multiple	Multiple	straight
569		0	No	No	No	No	No	No	No		No		Correct	Apical	Yes	No	34	47	0	1	1	<5°	Manual	5th	Post	Single	Single	straight
570		0	No	No	No	No	No	No	No		No		Correct	No Voids	No	No	35	24	0	1	2	<5°	Rotary	5th	Post	Single	Multiple	straight
294		1	No	No	Yes	No	No	No	Yes		No		Correct	Both	Yes	Yes	46	47	0	3	3	≥25°	Rotary	5th	Post	Multiple	Multiple	Curved
231		0	No	No	No	No	No	No	No		No		Correct	No Voids	No	No	13	38	0	1	2	<5°	Manual	5th	Ant	Single	Multiple	straight
282		1	No	Yes	No	No	No	No	No		No		Correct	Both	Yes	Yes	16	38	0	3	4	<20°	Rotary	5th	Post	Multiple	Multiple	Curved
142		0	No	No	No	No	No	No	No		No		Correct	No Voids	No	No	33	28	0	1	2	<20°	Rotary	5th	Ant	Single	Multiple	Curved
561		0	No	No	No	No	No	No	No		No		Correct	Coronal	Yes	No	45	64	0	1	2	<20°	Manual	5th	Post	Single	Multiple	Curved
22		0	No	No	No	No	No	No	No		No		Correct	No Voids	No	No	37	27	0	3	4	≥25°	Rotary	5th	Post	Multiple	Multiple	Curved
684		0	No	No	No	No	No	No	No		No		Correct	Both	Yes	No	14	38	0	2	4	<5°	Manual	5th	Post	Multiple	Multiple	straight
747		0	No	No	No	No	No	No	No		No		Correct	No Voids	No	No	15	43	1	2	3	<5°	Manual	5th	Post	Multiple	Multiple	straight
659		0	No	No	No	No	No	No	No		No		Short	No Voids	No	No	14	45	0	2	3	<20°	Manual	5th	Post	Multiple	Multiple	Curved
678		0	No	No	No	No	No	No	No		No		Correct	No Voids	No	No	26	24	0	3	3	<5°	Manual	5th	Post	Multiple	Multiple	straight
216		1	No	Yes	Yes	No	No	No	Yes		No		over extended	Coronal	Yes	Yes	16	32	0	3	4	<20°	Manual	5th	Post	Multiple	Multiple	Curved
111		0	No	No	No	No	No	No	No		No		Correct	No Voids	No	No	14	23	0	2	4	≥25°	Manual	5th	Post	Multiple	Multiple	Curved
516		1	Yes	No	Yes	No	No	No	Yes		No		Correct	Both	Yes	Yes	16	44	0	3	4	<20°	Manual	5th	Post	Multiple	Multiple	Curved
522		0	No	No	No	No	No	No	No		No		Correct	Both	Yes	No	34	27	0	1	2	<20°	Rotary	5th	Post	Single	Multiple	Curved
33		1	No	Yes	No	No	No	No	No		No		Correct	No Voids	No	Yes	46	21	0	3	3	<5°	Rotary	5th	Post	Multiple	Multiple	straight
7		0	No	No	No	No	No	No	No		No		Correct	No Voids	No	No	42	21	0	1	3	<5°	Manual	5th	Ant	Single	Multiple	straight
543		0	No	No	No	No	No	No	No		No		Correct	Coronal	Yes	No	37	39	0	3	1	≥25°	Rotary	5th	Post	Multiple	Single	Curved
255		0	No	No	No	No	No	No	No		No		Correct	Apical	Yes	No	35	70	0	1	3	<5°	Manual	5th	Post	Single	Multiple	straight
595		0	No	No	No	No	No	No	No		No		Correct	Both	Yes	No	25	40	0	1	3	<5°	Rotary	5th	Post	Single	Multiple	straight
655		0	No	No	No	No	No	No	No		No		Correct	No Voids	No	No	13	46	1	1	2	<5°	Rotary	5th	Ant	Single	Multiple	straight
110		0	No	No	No	No	No	No	No		No		Correct	No Voids	No	No	25	21	0	1	2	<5°	Rotary	5th	Post	Single	Multiple	straight
281		0	No	No	No	No	No	No	No		No		Correct	No Voids	No	No	22	36	0	1	3	<5°	Manual	5th	Ant	Single	Multiple	straight
248		0	No	No	No	No	No	No	No		No		Correct	No Voids	No	No	46	15	0	3	3	<20°	Manual	5th	Post	Multiple	Multiple	Curved
598		0	No	No	No	No	No	No	No		No		over extended	No Voids	No	No	45	51	0	1	3	<5°	Rotary	5th	Post	Single	Multiple	straight
782		0	No	No	No	No	No	No	No		No		Correct	No Voids	No	No	36	48	0	3	3	<20°	Manual	5th	Post	Multiple	Multiple	Curved
805		0	No	No	No	No	No	No	No		No		Correct	No Voids	No	No	16	48	0	3	2	<20°	Rotary	5th	Post	Multiple	Multiple	Curved
464		0	No	No	No	No	No	No	No		No		Correct	No Voids	No	No	37	25	0	3	4	<20°	Manual	5th	Post	Multiple	Multiple	Curved
27		0	No	No	No	No	No	No	No		No		Correct	No Voids	No	No	25	23	0	2	4	<5°	Manual	5th	Post	Multiple	Multiple	straight
102		0	No	No	No	No	No	No	No		No		Correct	No Voids	No	No	37	45	0	2	1	<20°	Rotary	5th	Post	Multiple	Single	Curved
797		1	No	No	Yes	No	No	No	Yes		No		Correct	No Voids	No	Yes	26	53	1	4	4	<5°	Manual	5th	Post	Multiple	Multiple	straight
493		1	No	No	Yes	No	No	No	Yes		No		Correct	Apical	Yes	Yes	14	55	0	2	4	<5°	Manual	5th	Post	Multiple	Multiple	straight
752		1	No	No	Yes	No	No	No	Yes		No		Short	No Voids	No	Yes	36	22	0	3	4	<20°	Manual	5th	Post	Multiple	Multiple	Curved
751		0	No	No	No	No	No	No	No		No		Correct	No Voids	No	No	25	51	0	1	2	<5°	Rotary	5th	Post	Single	Multiple	straight
581		1	No	No	Yes	No	No	No	Yes		No		over extended	Coronal	Yes	Yes	48	30	0	2	3	≥25°	Manual	5th	Post	Multiple	Multiple	Curved
652		1	No	Yes	No	No	No	No	No		No		Correct	Both	Yes	Yes	45	25	0	1	3	<5°	Manual	5th	Post	Single	Multiple	straight
259		1	No	No	Yes	No	No	No	Yes		No		over extended	No Voids	No	Yes	26	48	0	3	3	<20°	Rotary	5th	Post	Multiple	Multiple	Curved
161		0	No	No	No	No	No	No	No		No		Correct	Apical	Yes	No	24	36	0	2	2	<20°	Manual	5th	Post	Multiple	Multiple	Curved
285		0	No	No	No	No	No	No	No		No		Correct	Both	Yes	No	47	25	0	3	3	<20°	Rotary	5th	Post	Multiple	Multiple	Curved
398		0	No	No	No	No	No	No	No		Yes		Correct	Apical	Yes	Yes	26	29	0	4	4	<20°	Rotary	5th	Post	Multiple	Multiple	Curved
85		0	No	No	No	No	No	No	No		No		Correct	No Voids	No	No	15	36	1	1	2	<20°	Rotary	5th	Post	Single	Multiple	Curved
83		1	No	No	No	Yes	No	No	Yes		No		Correct	Coronal	Yes	Yes	16	42	0	3	3	<20°	Rotary	5th	Post	Multiple	Multiple	Curved
768		1	No	No	Yes	No	No	No	Yes		No		over extended	No Voids	No	Yes	16	24	0	3	2	<20°	Rotary	5th	Post	Multiple	Multiple	Curved
254		0	No	No	No	No	No	No	No		No		Correct	No Voids	No	No	35	48	0	1	3	<5°	Manual	5th	Post	Single	Multiple	straight
610		0	No	No	No	No	No	No	No		Yes		Correct	No Voids	No	Yes	25	20	0	2	4	≥25°	Manual	5th	Post	Multiple	Multiple	Curved
576		0	No	No	No	No	No	No	No		No		Correct	Apical	Yes	No	15	47	0	2	3	<5°	Manual	5th	Post	Multiple	Multiple	straight
746		0	No	No	No	No	No	No	No		No		Correct	Apical	Yes	No	34	60	0	1	3	<5°	Manual	5th	Post	Single	Multiple	straight
64		1	No	No	No	No	No	Yes	Yes		No		Correct	Apical	Yes	Yes	24	31	0	2	3	<20°	Manual	5th	Post	Multiple	Multiple	Curved
292		1	No	Yes	No	No	No	No	No		No		Correct	Apical	Yes	Yes	11	30	0	1	3	<5°	Manual	5th	Ant	Single	Multiple	straight
721		1	No	No	Yes	No	No	No	Yes		No		Correct	No Voids	No	Yes	26	14	0	4	4	≥25°	Manual	5th	Post	Multiple	Multiple	Curved
370		1	No	No	Yes	No	No	No	Yes		No		Correct	Coronal	Yes	Yes	46	28	0	3	3	≥25°	Rotary	5th	Post	Multiple	Multiple	Curved
477		0	No	No	No	No	No	No	No		No		Correct	Apical	Yes	No	45	31	0	2	3	<5°	Manual	5th	Post	Multiple	Multiple	straight
590		1	No	No	Yes	No	No	No	Yes		No		Correct	No Voids	No	Yes	36	20	0	3	4	≥25°	Rotary	5th	Post	Multiple	Multiple	Curved
300		1	No	No	Yes	No	No	No	Yes		No		Correct	Both	Yes	Yes	26	18	0	4	4	≥25°	Rotary	5th	Post	Multiple	Multiple	Curved
291		1	No	No	Yes	No	No	No	Yes		No		Correct	No Voids	No	Yes	14	30	0	2	3	<5°	Manual	5th	Post	Multiple	Multiple	straight
757		1	No	No	Yes	No	No	No	Yes		No		Correct	No Voids	No	Yes	16	49	0	4	4	<20°	Rotary	5th	Post	Multiple	Multiple	Curved
25		0	No	No	No	No	No	No	No		No		Correct	Coronal	Yes	No	27	48	0	3	4	≥25°	Manual	5th	Post	Multiple	Multiple	Curved
708		0	No	No	No	No	No	No	No		No		Correct	Both	Yes	No	15	29	0	2	3	<5°	Manual	5th	Post	Multiple	Multiple	straight
476		0	No	No	No	No	No	No	No		No		Correct	No Voids	No	No	25	31	0	2	3	<5°	Manual	5th	Post	Multiple	Multiple	straight
635		0	No	No	No	No	No	No	No		No		Correct	Apical	Yes	No	45	37	0	1	3	<5°	Rotary	5th	Post	Single	Multiple	straight
148		0	No	No	No	No	No	No	No		No		Correct	Coronal	Yes	No	14	70	1	2	2	<20°	Rotary	5th	Post	Multiple	Multiple	Curved
151		1	No	No	Yes	No	No	No	Yes		No		Correct	No Voids	No	Yes	25	27	0	1	3	<5°	Manual	5th	Post	Single	Multiple	straight
436		0	No	No	No	No	No	No	No		No		Correct	Apical	Yes	No	35	75	0	1	4	<5°	Manual	5th	Post	Single	Multiple	straight
503		1	No	No	Yes	No	No	No	Yes		No		over extended	Apical	Yes	Yes	15	27	0	1	2	<5°	Rotary	5th	Post	Single	Multiple	straight
504		0	No	No	No	No	No	No	No		No		Correct	Apical	Yes	No	15	22	0	1	3	<5°	Manual	5th	Post	Single	Multiple	straight
696		0	No	No	No	No	No	No	No		No		Correct	Both	Yes	No	15	34	0	1	2	<5°	Manual	5th	Post	Single	Multiple	straight
178		1	No	No	Yes	No	No	No	Yes		No		Correct	Coronal	Yes	Yes	37	34	0	3	4	≥25°	Rotary	5th	Post	Multiple	Multiple	Curved
711		0	No	No	No	No	No	No	No		No		Correct	Both	Yes	No	44	50	1	1	3	<20°	Manual	5th	Post	Single	Multiple	Curved
718		0	No	No	No	No	No	No	No		No		Correct	Coronal	Yes	No	46	54	0	3	4	<5°	Manual	5th	Post	Multiple	Multiple	straight
227		1	No	No	Yes	No	No	No	Yes		No		Correct	Apical	Yes	Yes	11	36	0	1	3	<5°	Manual	5th	Ant	Single	Multiple	straight
228		0	No	No	No	No	No	No	No		No		Correct	No Voids	No	No	45	40	0	1	3	<5°	Manual	5th	Post	Single	Multiple	straight
296		1	No	No	Yes	No	No	No	Yes		No		Correct	No Voids	No	Yes	13	73	1	1	4	<20°	Manual	5th	Ant	Single	Multiple	Curved
375		1	No	No	Yes	No	No	No	Yes		No		Correct	Both	Yes	Yes	35	41	0	1	3	<5°	Manual	5th	Post	Single	Multiple	straight
132		0	No	No	No	No	No	No	No		No		Correct	Apical	Yes	No	12	24	0	1	2	<5°	Manual	5th	Ant	Single	Multiple	straight
575		0	No	No	No	No	No	No	No		No		Correct	No Voids	No	No	45	44	0	1	2	<5°	Manual	5th	Post	Single	Multiple	straight
235		1	No	No	Yes	No	No	No	Yes		No		Correct	No Voids	No	Yes	24	31	0	1	4	<5°	Rotary	5th	Post	Single	Multiple	straight
194		0	No	No	No	No	No	No	No		No		Correct	Both	Yes	No	36	64	0	4	4	≥25°	Manual	5th	Post	Multiple	Multiple	Curved
205		0	No	No	No	No	No	No	No		No		Correct	No Voids	No	No	36	32	0	4	2	≥25°	Rotary	5th	Post	Multiple	Multiple	Curved
172		1	No	No	Yes	No	No	Yes	Yes		No		Correct	Apical	Yes	Yes	15	23	0	2	3	<20°	Manual	5th	Post	Multiple	Multiple	Curved
532		1	No	Yes	Yes	No	No	Yes	Yes		No		Correct	No Voids	No	Yes	46	16	0	3	3	<20°	Rotary	5th	Post	Multiple	Multiple	Curved
52		1	No	No	Yes	No	No	No	Yes		No		over extended	No Voids	No	Yes	34	44	0	1	4	<5°	Rotary	5th	Post	Single	Multiple	straight
478		0	No	No	No	No	No	No	No		No		Correct	Coronal	Yes	No	45	35	0	1	2	<5°	Rotary	5th	Post	Single	Multiple	straight
17		1	No	No	Yes	No	No	No	Yes		No		over extended	No Voids	No	Yes	25	23	0	2	3	<5°	Manual	5th	Post	Multiple	Multiple	straight
636		1	No	No	Yes	No	No	No	Yes		No		Correct	No Voids	No	Yes	27	45	0	3	3	<5°	Manual	5th	Post	Multiple	Multiple	straight
618		1	Yes	No	No	No	No	No	No		No		Short	No Voids	No	Yes	36	27	0	3	3	<20°	Manual	5th	Post	Multiple	Multiple	Curved
429		0	No	No	No	No	No	No	No		No		Correct	No Voids	No	No	11	30	0	1	3	<5°	Rotary	5th	Ant	Single	Multiple	straight
247		0	No	No	No	No	No	No	No		No		Correct	No Voids	No	No	24	37	0	2	3	<5°	Manual	5th	Post	Multiple	Multiple	straight
338		0	No	No	No	No	No	No	No		No		Short	Both	Yes	No	26	35	0	3	2	≥25°	Rotary	5th	Post	Multiple	Multiple	Curved
588		1	No	No	Yes	No	No	No	Yes		No		Correct	No Voids	No	Yes	14	66	1	2	4	<5°	Manual	5th	Post	Multiple	Multiple	straight
435		0	No	No	No	No	No	No	No		No		Correct	No Voids	No	No	14	48	0	2	4	≥25°	Rotary	5th	Post	Multiple	Multiple	Curved
546		1	No	No	Yes	No	No	No	Yes		No		Correct	No Voids	No	Yes	21	36	0	1	3	<5°	Manual	5th	Ant	Single	Multiple	straight
318		1	No	No	Yes	No	No	No	Yes		No		Correct	Both	Yes	Yes	41	26	1	1	3	<5°	Manual	5th	Ant	Single	Multiple	straight
380		0	No	No	No	No	No	No	No		No		Correct	No Voids	No	No	24	29	0	1	2	<5°	Rotary	5th	Post	Single	Multiple	straight
541		0	No	No	No	No	No	No	No		No		Correct	No Voids	No	No	46	23	0	3	3	<5°	Rotary	5th	Post	Multiple	Multiple	straight
551		0	No	No	No	No	No	No	No		No		Correct	No Voids	No	No	37	26	0	3	1	<20°	Rotary	5th	Post	Multiple	Single	Curved
241		1	Yes	No	No	No	No	No	No		No		Short	Coronal	Yes	Yes	36	27	0	3	3	≥25°	Manual	5th	Post	Multiple	Multiple	Curved
257		0	No	No	No	No	No	No	No		No		Correct	No Voids	No	No	45	51	0	1	2	<5°	Rotary	5th	Post	Single	Multiple	straight
408		1	No	No	Yes	No	No	No	Yes		No		Correct	No Voids	No	Yes	17	51	0	3	4	<5°	Manual	5th	Post	Multiple	Multiple	straight
451		1	No	No	Yes	No	No	No	Yes		No		Correct	No Voids	No	Yes	34	54	0	1	4	<20°	Manual	5th	Post	Single	Multiple	Curved
578		0	No	No	No	No	No	No	No		No		Correct	No Voids	No	No	15	30	0	2	3	<5°	Manual	5th	Post	Multiple	Multiple	straight
163		0	No	No	No	No	No	No	No		No		Correct	No Voids	No	No	44	27	0	1	3	<20°	Rotary	5th	Post	Single	Multiple	Curved
57		0	No	No	No	No	No	No	No		Yes		Correct	Both	Yes	Yes	16	24	0	3	4	≥25°	Manual	5th	Post	Multiple	Multiple	Curved
528		1	No	No	Yes	No	No	No	Yes		No		over extended	Apical	Yes	Yes	14	20	0	2	4	<20°	Manual	5th	Post	Multiple	Multiple	Curved
6		1	No	No	Yes	No	No	No	Yes		No		over extended	No Voids	No	Yes	36	32	0	3	1	<5°	Rotary	5th	Post	Multiple	Single	straight
360		0	No	No	No	No	No	No	No		No		Correct	No Voids	No	No	45	46	0	1	3	<5°	Rotary	5th	Post	Single	Multiple	straight
552		0	No	No	No	No	No	No	No		No		Correct	Coronal	Yes	No	34	28	0	1	3	<5°	Rotary	5th	Post	Single	Multiple	straight
152		0	No	No	No	No	No	No	No		No		Correct	No Voids	No	No	24	54	0	2	3	<20°	Manual	5th	Post	Multiple	Multiple	Curved
466		0	No	No	No	No	No	No	No		Yes		Correct	No Voids	No	Yes	15	54	0	2	4	<5°	Manual	5th	Post	Multiple	Multiple	straight
774		0	No	No	No	No	No	No	No		No		Correct	No Voids	No	No	47	30	0	3	3	<5°	Rotary	5th	Post	Multiple	Multiple	straight
218		0	No	No	No	No	No	No	No		No		Correct	No Voids	No	No	47	50	0	3	3	<20°	Rotary	5th	Post	Multiple	Multiple	Curved
147		0	No	No	No	No	No	No	No		Yes		Short	Coronal	Yes	Yes	47	30	0	2	4	≥25°	Manual	5th	Post	Multiple	Multiple	Curved
586		1	Yes	Yes	No	No	No	No	No		No		Short	Both	Yes	Yes	46	70	0	3	4	<20°	Rotary	5th	Post	Multiple	Multiple	Curved
363		0	No	No	No	No	No	No	No		No		Correct	No Voids	No	No	35	30	0	1	4	<5°	Manual	5th	Post	Single	Multiple	straight
627		0	No	No	No	No	No	No	No		No		Correct	Coronal	Yes	No	26	17	0	4	4	<5°	Manual	5th	Post	Multiple	Multiple	straight
293		1	Yes	No	No	No	No	No	No		No		Short	Coronal	Yes	Yes	44	45	0	1	3	<5°	Rotary	5th	Post	Single	Multiple	straight
4		0	No	No	No	No	No	No	No		No		Correct	Both	Yes	No	27	27	0	3	3	<5°	Rotary	5th	Post	Multiple	Multiple	straight
524		0	No	No	No	No	No	No	No		No		Correct	Apical	Yes	No	24	20	0	2	4	<20°	Manual	5th	Post	Multiple	Multiple	Curved
144		1	No	Yes	No	No	No	No	No		No		Correct	No Voids	No	Yes	16	29	0	3	4	≥25°	Manual	5th	Post	Multiple	Multiple	Curved
245		1	No	No	Yes	No	No	No	Yes		No		Correct	No Voids	No	Yes	26	21	0	3	4	<20°	Manual	5th	Post	Multiple	Multiple	Curved
518		0	No	No	No	No	No	No	No		No		Correct	Apical	Yes	No	15	27	0	1	2	<5°	Manual	5th	Post	Single	Multiple	straight
35		0	No	No	No	No	No	No	No		No		Correct	Both	Yes	No	16	25	0	4	4	≥25°	Rotary	5th	Post	Multiple	Multiple	Curved
712		1	No	No	Yes	No	No	No	Yes		No		Correct	Both	Yes	Yes	45	48	1	1	2	<5°	Manual	5th	Post	Single	Multiple	straight
298		1	Yes	No	No	No	No	No	No		No		Correct	Both	Yes	Yes	45	61	0	1	3	<5°	Manual	5th	Post	Single	Multiple	straight
332		0	No	No	No	No	No	No	No		No		Correct	Apical	Yes	No	24	66	1	2	2	<5°	Manual	5th	Post	Multiple	Multiple	straight
469		0	No	No	No	No	No	No	No		No		Correct	Apical	Yes	No	14	64	0	2	4	<20°	Manual	5th	Post	Multiple	Multiple	Curved
694		1	No	No	Yes	No	No	No	Yes		No		Correct	No Voids	No	Yes	25	59	0	2	4	≥25°	Manual	5th	Post	Multiple	Multiple	Curved
2		1	No	No	Yes	No	No	No	Yes		No		Correct	No Voids	No	Yes	46	19	0	3	3	<20°	Manual	5th	Post	Multiple	Multiple	Curved
441		1	No	No	Yes	No	No	No	Yes		No		over extended	Apical	Yes	Yes	35	27	0	1	2	<20°	Rotary	5th	Post	Single	Multiple	Curved
669		0	No	No	No	No	No	No	No		No		Correct	No Voids	No	No	44	53	0	1	1	<5°	Manual	5th	Post	Single	Single	straight
184		0	No	No	No	No	No	No	No		No		Correct	No Voids	No	No	44	22	0	1	2	<5°	Manual	5th	Post	Single	Multiple	straight
280		0	No	No	No	No	No	No	No		No		Correct	Both	Yes	No	14	36	0	2	3	<5°	Rotary	5th	Post	Multiple	Multiple	straight
133		1	No	No	Yes	No	No	No	Yes		No		Correct	No Voids	No	Yes	37	31	0	2	4	<20°	Rotary	5th	Post	Multiple	Multiple	Curved
200		1	Yes	No	No	No	No	No	No		No		Short	No Voids	No	Yes	25	27	0	1	4	<20°	Manual	5th	Post	Single	Multiple	Curved
256		0	No	No	No	No	No	No	No		No		Correct	No Voids	No	No	14	38	0	1	1	<20°	Rotary	5th	Post	Single	Single	Curved
324		0	No	No	No	No	No	No	No		No		Correct	Coronal	Yes	No	46	21	0	3	4	≥25°	Manual	5th	Post	Multiple	Multiple	Curved
709		1	No	No	Yes	No	No	No	Yes		No		Correct	Apical	Yes	Yes	22	44	0	1	2	<5°	Manual	5th	Ant	Single	Multiple	straight
140		1	No	No	Yes	No	No	No	Yes		No		Correct	No Voids	No	Yes	46	24	0	3	2	<20°	Rotary	5th	Post	Multiple	Multiple	Curved
215		0	No	No	No	No	No	No	No		No		Correct	No Voids	No	No	45	54	0	1	2	<5°	Rotary	5th	Post	Single	Multiple	straight
498		1	No	No	Yes	No	No	No	Yes		No		Correct	No Voids	No	Yes	34	39	0	1	4	<20°	Rotary	5th	Post	Single	Multiple	Curved
438		1	No	No	Yes	No	No	No	Yes		No		over extended	Both	Yes	Yes	42	30	0	1	3	<5°	Manual	5th	Ant	Single	Multiple	straight
415		1	No	No	Yes	No	No	No	Yes		No		over extended	Both	Yes	Yes	46	23	0	4	4	<20°	Manual	5th	Post	Multiple	Multiple	Curved
58		1	No	No	Yes	No	No	No	Yes		No		over extended	Both	Yes	Yes	36	34	0	3	4	<20°	Manual	5th	Post	Multiple	Multiple	Curved
750		0	No	No	No	No	No	No	No		No		Correct	No Voids	No	No	21	25	0	1	2	<20°	Manual	5th	Ant	Single	Multiple	Curved
559		0	No	No	No	No	No	No	No		No		Correct	No Voids	No	No	46	38	0	4	3	<5°	Rotary	5th	Post	Multiple	Multiple	straight
87		0	No	No	No	No	No	No	No		No		Correct	Coronal	Yes	No	34	25	1	1	3	<5°	Manual	5th	Post	Single	Multiple	straight
16		0	No	No	No	No	No	No	No		No		Correct	No Voids	No	No	35	53	1	1	3	<20°	Manual	5th	Post	Single	Multiple	Curved
764		0	No	No	No	No	No	No	No		No		Correct	Coronal	Yes	No	24	20	0	1	3	≥25°	Manual	5th	Post	Single	Multiple	Curved
763		0	No	No	No	No	No	No	No		No		Correct	Coronal	Yes	No	46	20	0	4	4	<5°	Manual	5th	Post	Multiple	Multiple	straight
164		0	No	No	No	No	No	No	No		No		Correct	Apical	Yes	No	47	24	0	2	3	<20°	Manual	5th	Post	Multiple	Multiple	Curved
414		0	No	No	No	No	No	No	No		No		Correct	No Voids	No	No	46	22	0	3	4	<5°	Manual	5th	Post	Multiple	Multiple	straight
286		0	No	No	No	No	No	No	No		No		Correct	No Voids	No	No	27	48	0	3	4	<20°	Rotary	5th	Post	Multiple	Multiple	Curved
664		0	No	No	No	No	No	No	No		No		Correct	No Voids	No	No	24	20	0	2	3	<5°	Manual	5th	Post	Multiple	Multiple	straight
789		0	No	No	No	No	No	No	No		No		Correct	No Voids	No	No	45	45	0	1	1	<20°	Manual	5th	Post	Single	Single	Curved
382		0	No	No	No	No	No	No	No		No		Correct	No Voids	No	No	35	36	0	1	1	<5°	Rotary	5th	Post	Single	Single	straight
770		1	No	No	Yes	No	No	Yes	Yes		No		Correct	Apical	Yes	Yes	26	38	0	4	4	<5°	Manual	5th	Post	Multiple	Multiple	straight
357		0	No	No	No	No	No	No	No		No		Correct	No Voids	No	No	16	16	0	4	4	<20°	Rotary	5th	Post	Multiple	Multiple	Curved
621		1	No	No	Yes	Yes	No	No	Yes		No		over extended	Coronal	Yes	Yes	46	24	0	3	4	≥25°	Manual	5th	Post	Multiple	Multiple	Curved
339		1	No	No	Yes	No	No	No	Yes		Yes		over extended	Both	Yes	Yes	46	48	0	3	4	≥25°	Manual	5th	Post	Multiple	Multiple	Curved
683		1	Yes	No	No	No	No	No	No		No		Correct	Apical	Yes	Yes	14	42	0	2	3	<5°	Manual	5th	Post	Multiple	Multiple	straight
376		0	No	No	No	No	No	No	No		No		Correct	No Voids	No	No	24	41	0	2	3	<5°	Manual	5th	Post	Multiple	Multiple	straight
74		1	No	No	Yes	No	No	No	Yes		No		Correct	No Voids	No	Yes	15	42	0	2	2	<20°	Manual	5th	Post	Multiple	Multiple	Curved
208		1	No	No	Yes	No	No	No	Yes		No		Correct	Coronal	Yes	Yes	15	34	0	2	4	<5°	Manual	5th	Post	Multiple	Multiple	straight
614		1	No	No	Yes	No	No	No	Yes		No		over extended	No Voids	No	Yes	31	26	1	1	1	<5°	Manual	5th	Ant	Single	Single	straight
185		1	No	No	Yes	No	No	No	Yes		No		Correct	Coronal	Yes	Yes	14	59	1	2	4	<5°	Manual	5th	Post	Multiple	Multiple	straight
170		1	No	No	Yes	No	No	No	Yes		No		Correct	No Voids	No	Yes	16	28	0	3	3	<20°	Rotary	5th	Post	Multiple	Multiple	Curved
106		0	No	No	No	No	No	No	No		No		Correct	No Voids	No	No	23	45	0	1	1	<20°	Rotary	5th	Ant	Single	Single	Curved
369		1	No	No	Yes	No	No	No	Yes		No		Correct	Both	Yes	Yes	25	38	0	1	4	<5°	Manual	5th	Post	Single	Multiple	straight
411		1	No	No	Yes	No	No	No	Yes		No		Correct	No Voids	No	Yes	25	55	0	1	4	<5°	Manual	5th	Post	Single	Multiple	straight
455		0	No	No	No	No	No	No	No		No		Correct	No Voids	No	No	16	20	0	4	4	<20°	Manual	5th	Post	Multiple	Multiple	Curved
236		1	No	No	Yes	No	No	No	Yes		No		Correct	Both	Yes	Yes	45	32	0	1	3	<5°	Manual	5th	Post	Single	Multiple	straight
402		1	No	No	Yes	No	No	No	Yes		No		over extended	No Voids	No	Yes	45	30	0	1	2	<20°	Rotary	5th	Post	Single	Multiple	Curved
107		1	No	No	Yes	No	No	No	Yes		No		Correct	Coronal	Yes	Yes	44	27	1	1	2	<5°	Rotary	5th	Post	Single	Multiple	straight
79		0	No	No	No	No	No	No	No		No		Correct	No Voids	No	No	15	36	0	2	4	<5°	Manual	5th	Post	Multiple	Multiple	straight
108		0	No	No	No	No	No	No	No		No		Correct	Apical	Yes	No	15	21	0	1	2	<20°	Manual	5th	Post	Single	Multiple	Curved
243		0	No	No	No	No	No	No	No		No		Correct	No Voids	No	No	14	38	0	2	2	<5°	Manual	5th	Post	Multiple	Multiple	straight
717		0	No	No	No	No	No	No	No		No		Short	No Voids	No	No	35	61	0	1	1	<5°	Manual	5th	Post	Single	Single	straight
195		1	Yes	No	No	No	No	No	No		No		Short	Both	Yes	Yes	47	50	0	3	3	<20°	Manual	5th	Post	Multiple	Multiple	Curved
162		0	No	No	No	No	No	No	No		Yes		Correct	Both	Yes	Yes	16	24	0	3	4	≥25°	Manual	5th	Post	Multiple	Multiple	Curved
63		1	No	No	Yes	No	No	No	Yes		No		Correct	No Voids	No	Yes	16	54	0	3	4	<20°	Manual	5th	Post	Multiple	Multiple	Curved
304		0	No	No	No	No	No	No	No		No		Correct	Both	Yes	No	14	21	0	2	4	<5°	Manual	5th	Post	Multiple	Multiple	straight
737		1	No	No	Yes	No	No	No	Yes		No		over extended	Apical	Yes	Yes	35	25	0	1	3	<5°	Manual	5th	Post	Single	Multiple	straight
447		0	No	No	No	No	No	No	No		No		Correct	No Voids	No	No	15	42	0	1	3	<5°	Manual	5th	Post	Single	Multiple	straight
771		0	No	No	No	No	No	No	No		No		Correct	No Voids	No	No	45	36	1	1	2	<5°	Rotary	5th	Post	Single	Multiple	straight
272		0	No	No	No	No	No	No	No		No		Correct	No Voids	No	No	36	16	0	3	3	<20°	Rotary	5th	Post	Multiple	Multiple	Curved
113		1	No	No	Yes	No	No	No	Yes		No		Correct	Both	Yes	Yes	32	50	1	1	2	<5°	Rotary	5th	Ant	Single	Multiple	straight
542		0	No	No	No	No	No	No	No		No		Correct	No Voids	No	No	11	49	0	1	3	<5°	Manual	5th	Ant	Single	Multiple	straight
190		0	No	No	No	No	No	No	No		No		Correct	No Voids	No	No	25	20	0	2	2	<5°	Manual	5th	Post	Multiple	Multiple	straight
